# Supplementary material
Source: PubMed Central journal article supplement (PMC8791284)
Supplement: NIHMS1770058-supplement-Supplementary_Material.pdf [file NIHMS1770058-supplement-Supplementary_Material.pdf]

## Supplementary Data

**Table 1**      **Details of the ATP-based cell viability assay**

| <b>Cell lines</b>        | <b>Culture media</b>                                                  | <b>Cells plated/well</b>           | <b>Doubling time (hr)</b> |
|--------------------------|-----------------------------------------------------------------------|------------------------------------|---------------------------|
| MEF KRAS <sup>G12D</sup> | DMEM+10%FBS+1mM Sodium Pyruvate<br>(Thermo Fisher Scientific, 11965)  | 1500(384-well)/<br>300 (1536-well) | 26                        |
| MEF HRAS <sup>WT</sup>   | DMEM+10%FBS+1mM Sodium Pyruvate                                       | 1500(384-well)/<br>300 (1536-well) | 27                        |
| MEF NRAS                 | DMEM+10%FBS+1mM Sodium Pyruvate                                       | 1500 (384-well)                    | 40                        |
| SW620                    | DMEM+10%FBS+1mM Sodium Pyruvate                                       | 1500 (384-well)                    | 30                        |
| LS513                    | RPMI-1640+10%FBS+2mM L-Glutamine<br>(Thermo Fisher Scientific, 31870) | 1000 (384-well)                    | 54                        |
| Colo320                  | RPMI-1640+10%FBS+2mM L-Glutamine                                      | 1000 (384-well)                    | 27                        |

The doubling time was calculated as  $[T \times (\ln 2)] / [\ln(C_{T_0}/C_{T_e})]$ , where T = assay time duration,  $C_{T_0}$  = cell number at time = 0,  $C_{T_e}$  = cell number at the end of the experiment.

**Table 2 Kinases inhibited by selected compounds**

| Series                                            | Cluster 44   | Cluster 06                                                                                                                                          | Cluster 23                                                                                                                                                                                                                                                                                                                                                                                           | Cluster 04                                                                                                                             |                         | Natural product |
|---------------------------------------------------|--------------|-----------------------------------------------------------------------------------------------------------------------------------------------------|------------------------------------------------------------------------------------------------------------------------------------------------------------------------------------------------------------------------------------------------------------------------------------------------------------------------------------------------------------------------------------------------------|----------------------------------------------------------------------------------------------------------------------------------------|-------------------------|-----------------|
| Cluster size                                      | 300          | 152                                                                                                                                                 | 200                                                                                                                                                                                                                                                                                                                                                                                                  | 85 (sub-group 1)                                                                                                                       | 35 (sub-group 2)        | 5               |
| Best compound                                     | 44-1         | 6-1                                                                                                                                                 | 23-1                                                                                                                                                                                                                                                                                                                                                                                                 | 4-1                                                                                                                                    | 4-2                     | NP-1            |
| Human kinases inhibited (> 50% inhibition @0.1µM) | TRKC<br>MKK6 | CDK9/cyclin T1<br>CaMKII delta<br>CDK5/p25<br>CLK2<br>DYRK2<br>FLT3<br>LRRK2<br>MELK<br>p70S6K<br>PIM-1<br>PKA<br>PKB alpha<br>PKCθ<br>PKCζ<br>RSK1 | CDK9/cyclinT1<br>AAK1<br>ARK5<br>AURORA-B<br>AURORA-C<br>BKe<br>CaMKIIγ<br>CaMKK2<br>CDK7/cyclinH/MAT1<br>CDKL2<br>CDKL3<br>CDKL4<br>CK2α2<br>CLK1<br>CLK2<br>CLK4<br>DDR1<br>DRAK1<br>DYRK1A<br>DYRK1B<br>FLT1<br>FLT3<br>GCK<br>HCK activated<br>HIPK1<br>HIPK2<br>HIPK3<br>IRAK1<br>IRAK4<br>LCK<br>MAP4K3<br>MAP4K4<br>MELK<br>MYLK2<br>PhKy1<br>PhKy2<br>RIPK2<br>TAF1L<br>TAK1<br>TIE2<br>TRB2 | CDK9/cyclinT1<br>AMPKα2<br>CaMKIIδ<br>CDK1/cyclinB<br>CDK5/p25<br>CLK2<br>FLT3<br>GSK3α<br>GSK3β<br>IKKε<br>KDR<br>LYN<br>LRRK2<br>PKA | CDK9/cyclin T1<br>CDKL3 | No kinases      |

**Table 3 Cell-based and biochemical assay data of selected compounds**

|                           | Series        | Cluster 44 | Cluster 06 | Cluster 23 | Cluster 04 |           | Natural product | Positive control           |
|---------------------------|---------------|------------|------------|------------|------------|-----------|-----------------|----------------------------|
|                           | Best compound | 44-1       | 6-1        | 23-1       | 4-1        | 4-2       | NP-1            |                            |
| <b>Cell-based assays</b>  | pEGFR HTRF*   | ND         | 146.02%    | ND         | ND         | ND        | ND              | AG1478 (28.4%)             |
|                           | pERK HTRF     | NA         | ND         | 1.80E-08   | ND         | >1.22E-05 | NA              | Trametinib (IC50=37.3nM)   |
|                           | pAKT HTRF     | 5.12E-06   | ND         | ND         | ND         | >1.22E-05 | NA              | Proprietary (IC50=759nM)   |
| <b>Biochemical assays</b> | BRAF V600E    | NA         | 3.51E-06   | 2.06E-06   | 9.37E-07   | >3.03E-05 | ND              | Vemurafenib (IC50=749nM)   |
|                           | MEK1          | NA         | 1.49E-05   | >3.03E-05  | 3.69E-06   | >3.03E-05 | ND              | Proprietary (IC50=54.5nM)  |
|                           | ERK2          | NA         | >2.99E-05  | >3.03E-05  | 3.15E-06   | >3.03E-05 | ND              | Proprietary (IC50=224nM)   |
|                           | PI3K alpha    | NA         | NA         | >1.82E-05  | >1.82E-05  | NA        | ND              | Wortmanin (IC50=165nM)     |
|                           | AKT           | NA         | 1.60E-07   | >3.03E-05  | 2.51E-06   | >3.03E-05 | ND              | Staurosporine (IC50=857nM) |
|                           | mTOR          | NA         | NA         | NA         | >1.82E-05  | >1.82E-05 | ND              | PI-103 (IC50=118nM)        |

NA: no activity

ND: not determined

\*pEGFR HTRF: Compounds (single dose of 5 $\mu$ M) were tested in BxPC-3 cells in the pEGFR HTRF assay. Data were presented as relative to the DMSO-treated samples. 1.25 $\mu$ M AG1478 was used as the positive control.

**Figure 1 RAS levels in MEFs and colon cancer cell lines**

**A**

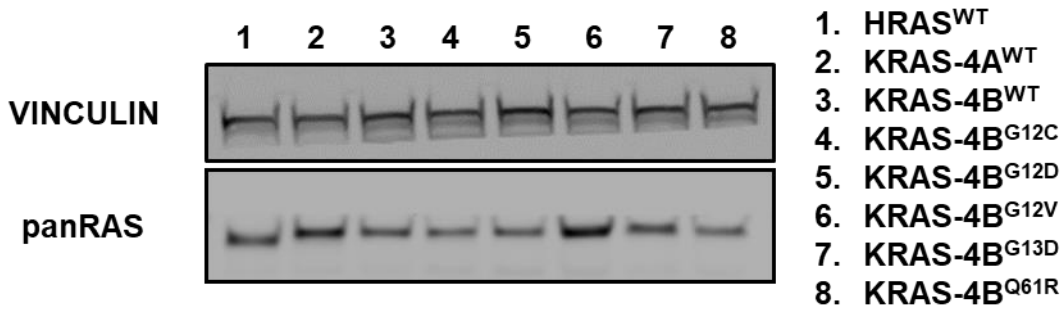

**B**

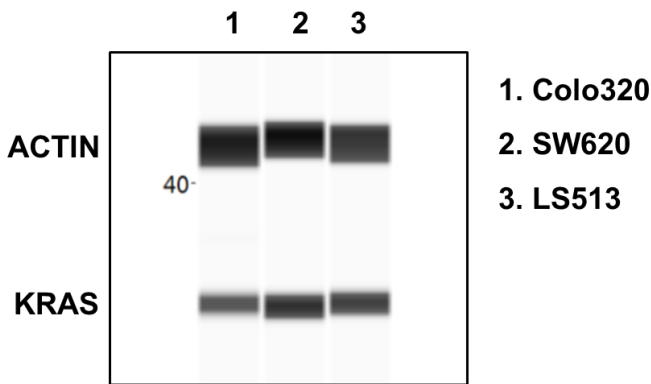

(A) The RAS levels of MEF cell lines were determined by western blots, with antibodies against RAS (Thermo Fisher Scientific, 1862335) and Vinculin (Cell Signaling Technology, 13801).

(B) The RAS levels of colon cancer cell lines were determined with the Sally Sue apparatus (Protein Simple), using antibodies against KRAS (Sigma, WH0003845M1) and Actin (Cell Signaling Technology, 4967).

**Figure 2 Selection criteria and statistics of the Phase 1 high throughput screen**

**A**

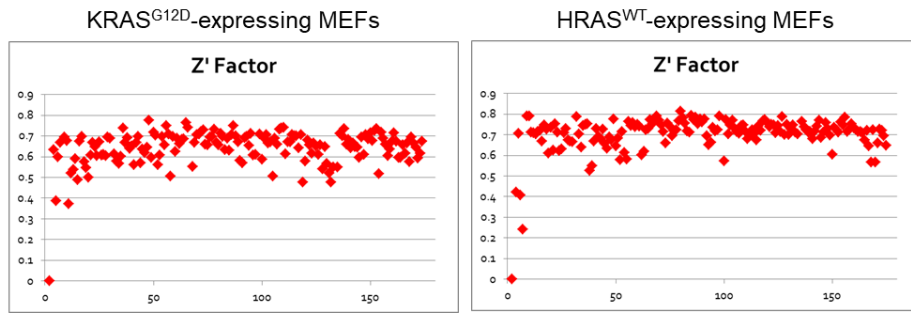

**B**

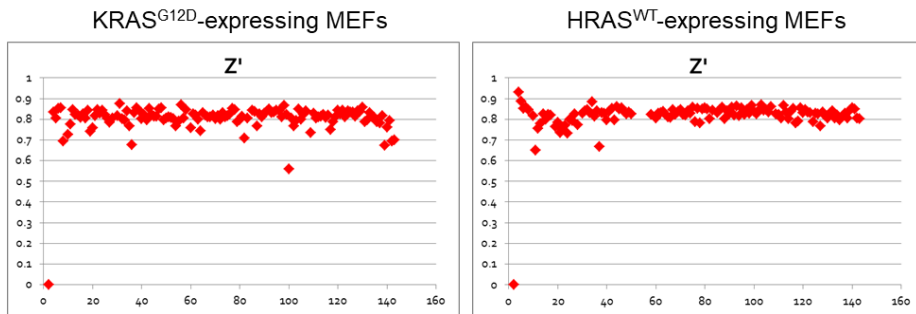

**C**

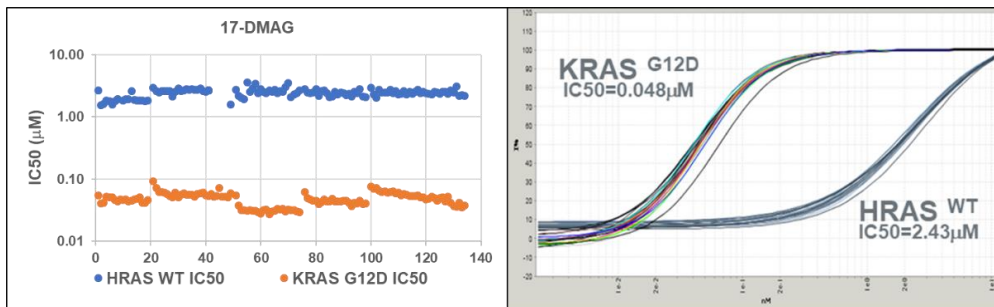

**D**

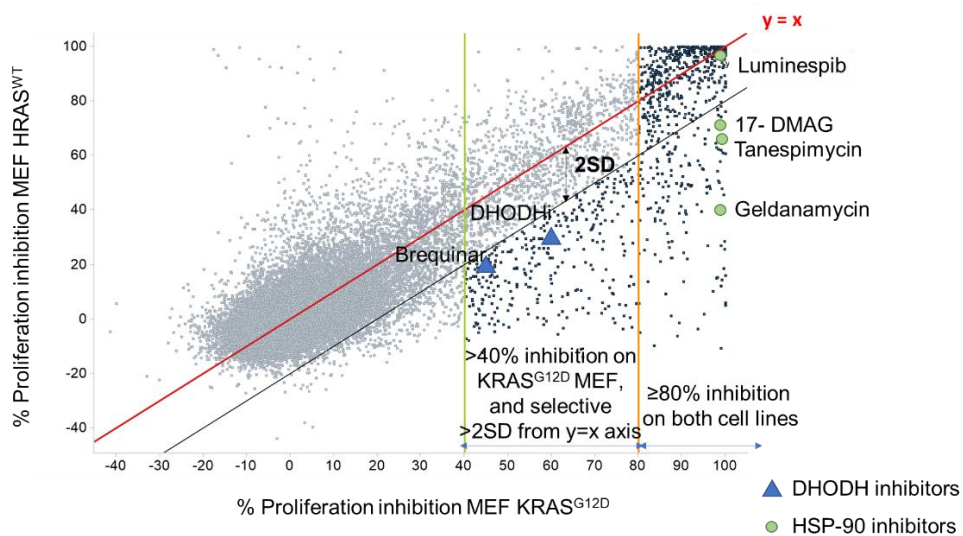

(A, B) The Z' factor of the CellTiter-Glo® assay of each assay plate (A: 1536-well plates; B: 384-well plates) was determined, and data from some of the assay plates were shown.

(C) The dose-response of a reference compound, 17-DMAG, was determined in each assay plate. Data from some of the assay plates were shown.

(D) Selection metric of the primary screen with KRAS<sup>G12D</sup>-expressing and HRAS<sup>WT</sup>-expressing MEFs, with targets identified by previous screens (DHODH and HSP-90). For clarity only 40,000 compounds were shown.

**Figure 3** KRAS<sup>G12D</sup>-expressing MEFs were more sensitive than HRAS<sup>WT</sup>-expressing MEFs to SNS032

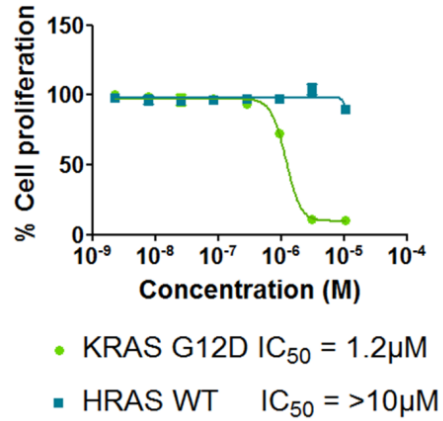

MEFs were treated for 72 hours with SNS032 and examined with CellTiter-Glo® assay. IC<sub>50</sub> values were determined by dose-response curves generated from two independent experiments. Data were presented as the percentage to the DMSO-treated samples.
